# Supplementary material for: Transcriptionally promiscuous “blurry” promoters in Tc1/mariner transposons allow transcription in distantly related genomes
Source: PubMed Central journal article supplement (PMC6446368; doi:10.1186/s13100-019-0155-6), 2019-04-03

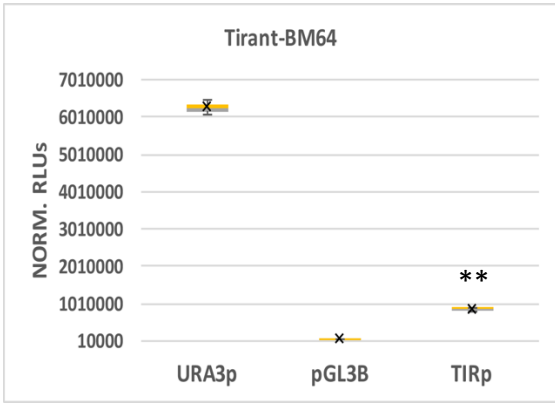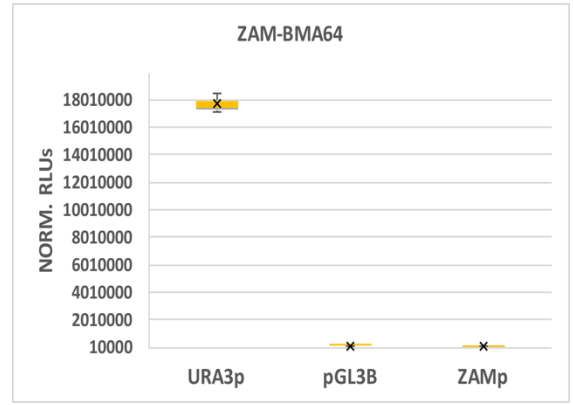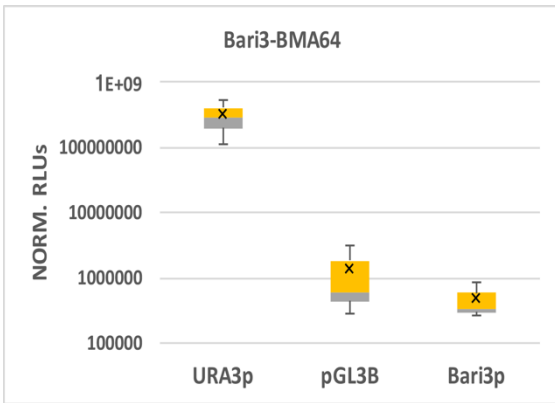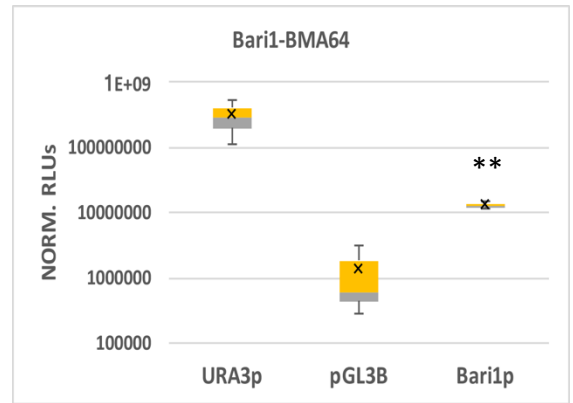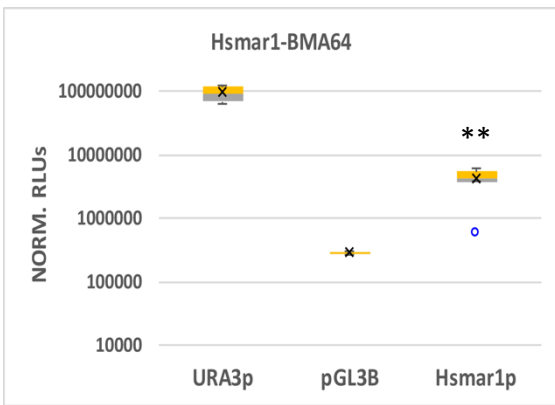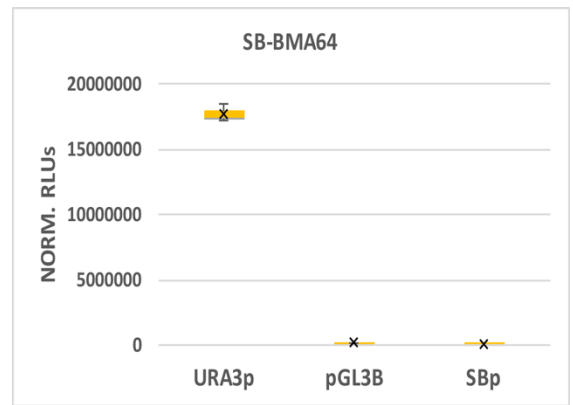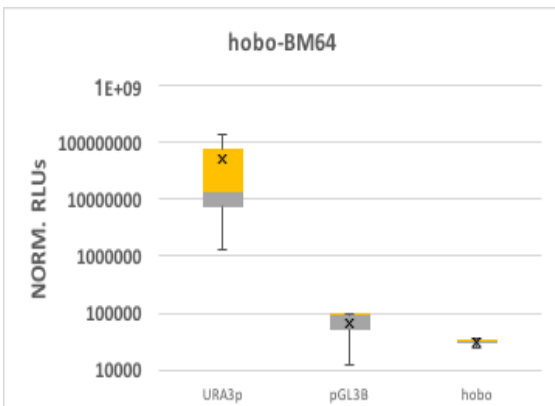

Supplement: 13100_2019_155_MOESM7_ESM.pdf [file 13100_2019_155_MOESM7_ESM.pdf]
